# Supplementary material
Source: PubMed Central journal article supplement (PMC9275245)
Supplement: aem.00358-22-s0001.pdf [file aem.00358-22-s0001.pdf]

Substrate (added to the microbial culture)

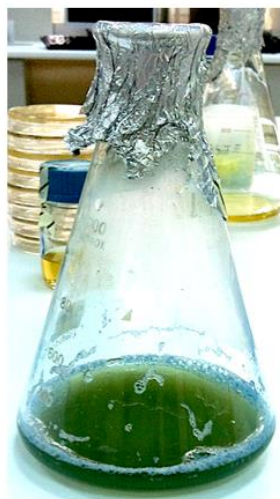

Product (in the supernatant)

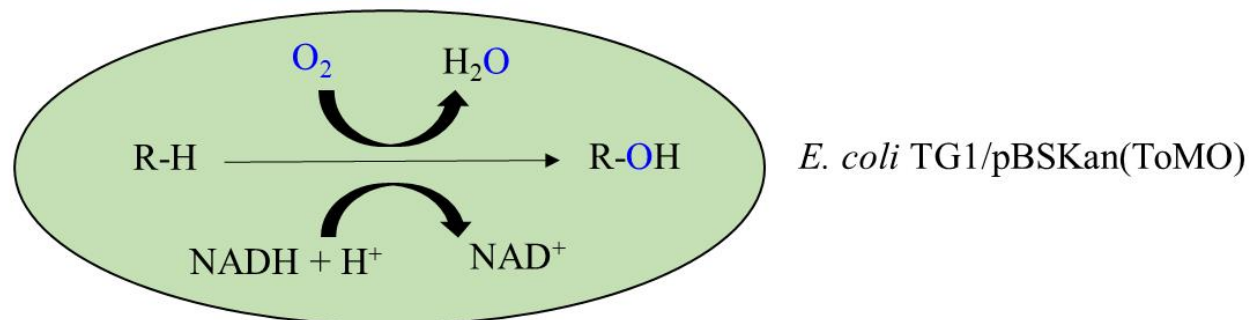

**Fig. S1** *E. coli* strain TG1 expressing ToMO in pBS(Kan)ToMO (9) produces blue colored indigo resulting from the oxidation of indole generated by tryptophanase activity in TG1 cells (29). The aromatic substrate (R-H) is added to the culture expressing ToMO and enters the cell. ToMO incorporates a single atom of molecular oxygen ( $\text{O}_2$ ) into the aromatic substrate while the other O atom is reduced to water with electrons from NADH which is provided by the cell. The product (R-OH) leaves the cell and can be detected from the culture supernatant.
